# Supplementary material for: Effects of Hydrothermal Processing Duration on the Texture, Starch and Protein In Vitro Digestibility of Cowpeas, Chickpeas and Kidney Beans
Source: MDPI journal article supplement (doi:10.3390/foods10061415), 2021-06-18
Supplement: s1 [file s1]

# Effects of hydrothermal processing duration on the texture, starch and protein *in vitro* digestibility of cowpeas, chickpeas, and kidney beans

Prit Khrisanapant <sup>1,2</sup>, Sze Ying Leong <sup>1,2</sup>, Biniam Kebede <sup>1</sup>, and Indrawati Oey <sup>1,2 \*</sup>

<sup>1</sup> Department of Food Science, University of Otago, PO Box 56, Dunedin 9054, New Zealand; prit.khrisanapant@outlook.com (P.K.); biniam.kebede@otago.ac.nz (B.K.); sze.leong@otago.ac.nz (S.Y.L.)

<sup>2</sup> Riddet Institute, Private Bag 11 222, Palmerston North 4442, New Zealand

\* Correspondence: indrawati.oey@otago.ac.nz; Tel: +64-3-479-8735

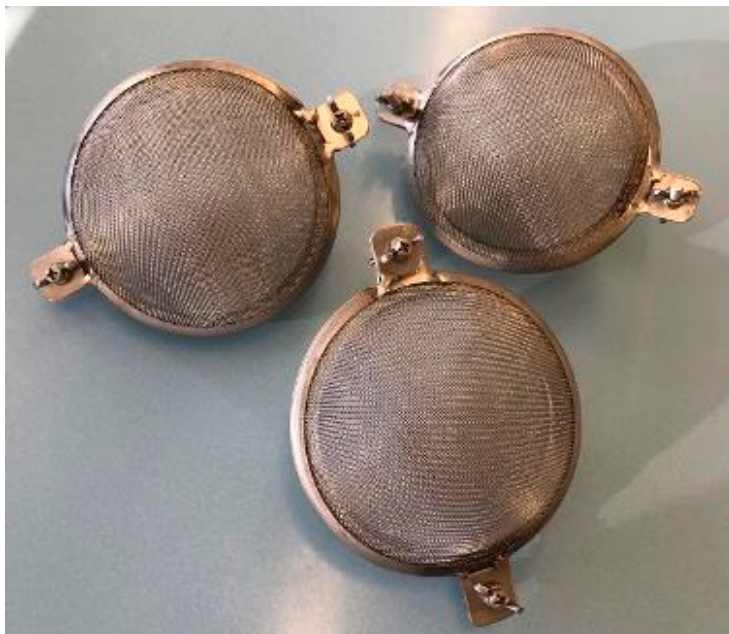

**Figure S1.** Picture of stainless-steel sieves used during hydrothermal processing of legumes.

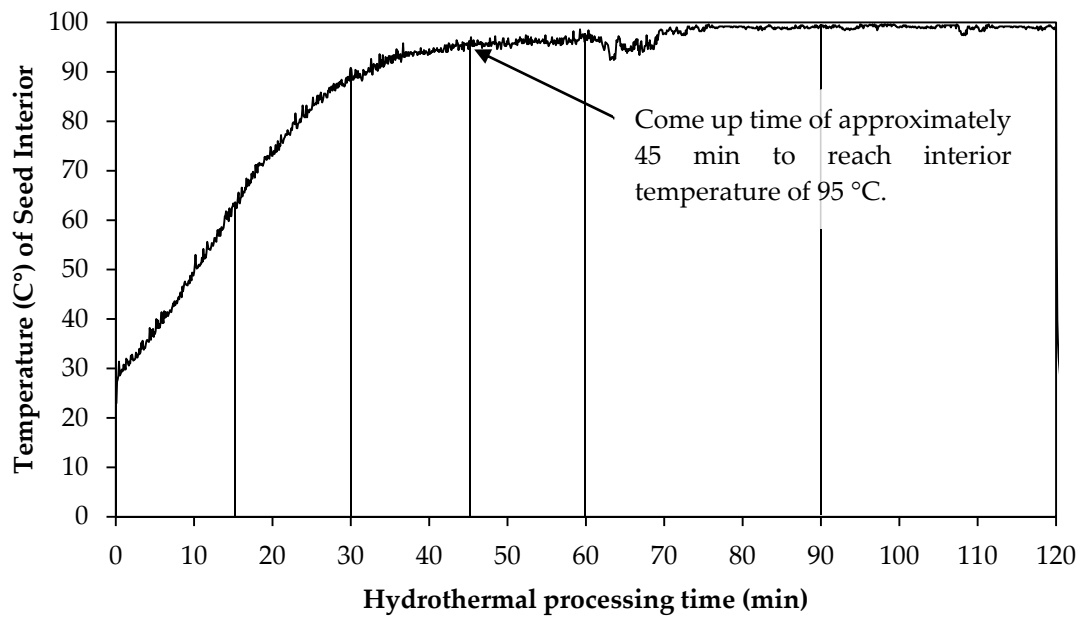

**Figure S2.** Time-temperature profile of seed interior during hydrothermal processing.

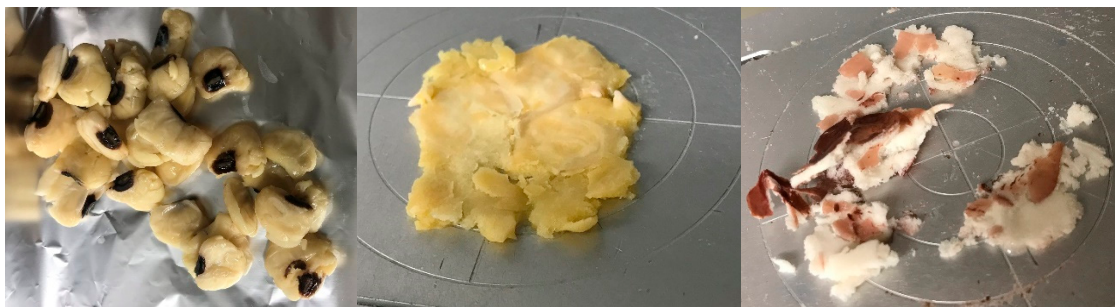

**Figure S3.** From left to right: soaked cowpeas, boiled chickpea and boiled kidney bean after compression to 90% of its strain using a texture analyser (TA.HDplus texture analyser platform using a 50 mm diameter cylinder probe (P/50)).

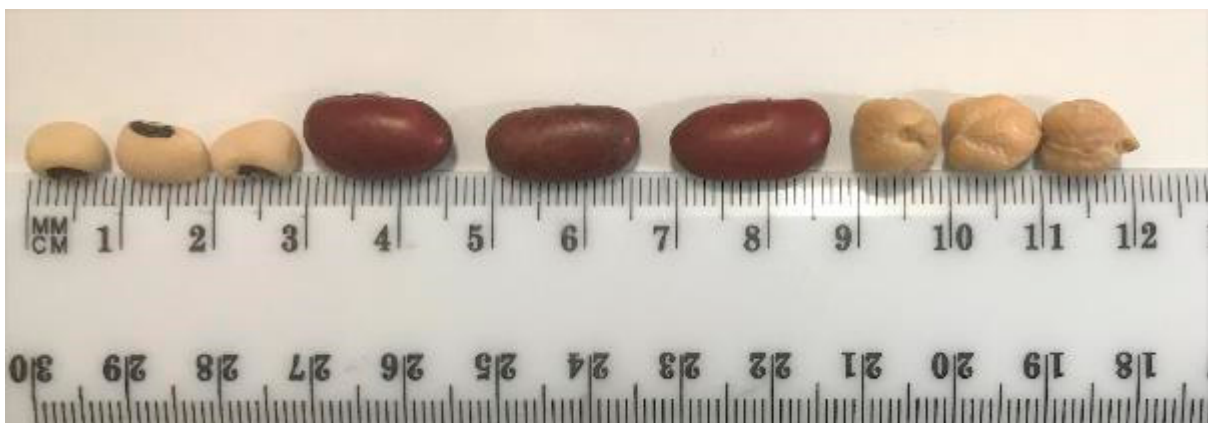

**Figure S4.** Picture of cowpea (left), kidney bean (middle), and chickpea (right) with different sizes used in this study.

**Table S1.** Starch, protein, lipid and moisture content of chickpeas, cowpeas and kidney beans.

| Legume       | Starch<br>(% DW) | Protein<br>(% DW) | Lipid<br>(% DW) | Moisture<br>(% FW) |
|--------------|------------------|-------------------|-----------------|--------------------|
| Cowpeas      | 49.49            | 21.58             | 3.46            | 9.13               |
| Chickpeas    | 47.25            | 16.74             | 7.73            | 8.27               |
| Kidney beans | 51.07            | 16.39             | 3.59            | 12.52              |

% DW represents % value in dry weight. % FW represents % value in fresh weight.
